# Supplementary material for: Exploring and suppressing the kink effect of black phosphorus field-effect transistors operating in the saturation regime
Source: Royal Society of Chemistry journal article supplement (doi:10.1039/c9nr02907a), 2019-01-01
Supplement: c9nr02907a1.pdf [file c9nr02907a1.pdf]

## Electronic Supplementary Information

### Exploring and Suppressing Kink Effect of Black Phosphorus Field-Effect Transistors Operating in Saturation Regime

Ying Xia,<sup>‡a</sup> Guoli Li,<sup>‡\*b</sup> Bei Jiang,<sup>a</sup> Zhenyu Yang,<sup>a</sup> Xingqiang Liu,<sup>b</sup> Xiangheng Xiao,<sup>a</sup> Denis Flandre,<sup>b,c</sup> Chunlan Wang,<sup>d</sup> Yuan Liu<sup>b</sup> and Lei Liao<sup>\*a,b</sup>

---

<sup>a</sup> School of Physics and Technology, Wuhan University, Wuhan 430072, China. E-mail: liaolei@whu.edu.cn

<sup>b</sup> State Key Laboratory for Chemo/Biosensing and Chemometrics, School of Physics and Electronics, Hunan University, Changsha 410082, China. E-mail: liguoli\_lily@hnu.edu.cn

<sup>c</sup> Institute of Information and Communication Technologies, Electronics and Applied Mathematics, Université catholique de Louvain, Louvain-la-Neuve B-1348, Belgium

<sup>d</sup> School of Science Xi'an Polytechnic University, Xi'an 710048, China

\*Corresponding author email: liaolei@whu.edu.cn; liguoli\_lily@hnu.edu.cn.

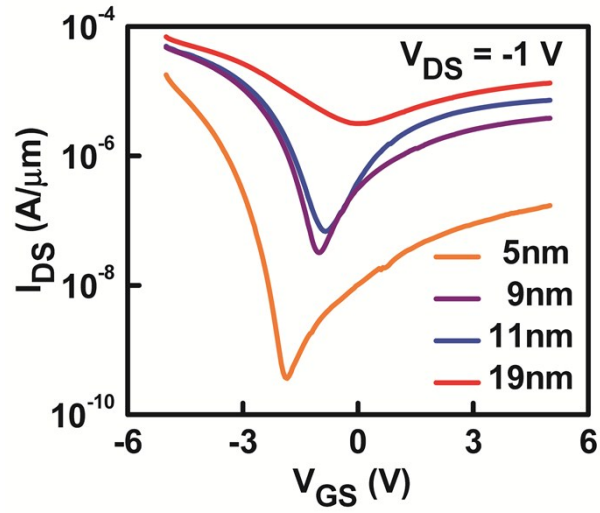

**Fig. S1** Transfer characteristics ( $I_{DS}-V_{GS}$ ) of the BP FETs at  $V_{DS} = -1.0$  V, with various BP thicknesses of  $\sim 5$ ,  $\sim 9$ ,  $\sim 11$  and 19 nm and fixed channel length  $L$  of 3  $\mu m$ .

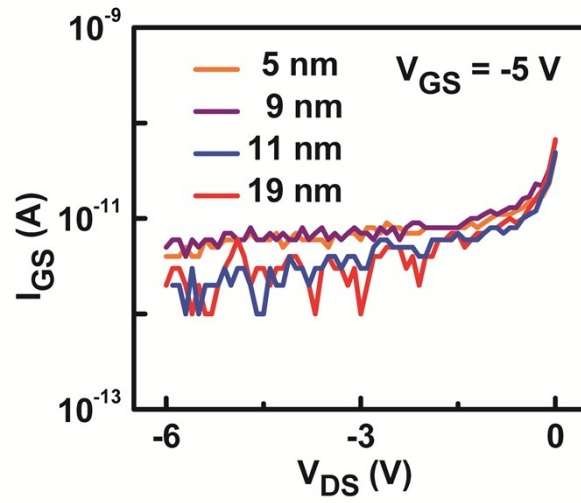

**Fig. S2** Leakage current characteristics ( $I_{GS}-V_{DS}$ ) of the BP FETs at  $V_{GS} = -5.0$  V, with various BP thicknesses of  $\sim 5$ ,  $\sim 9$ ,  $\sim 11$  and  $\sim 19$  nm and fixed channel length  $L$  of  $3 \mu\text{m}$ .

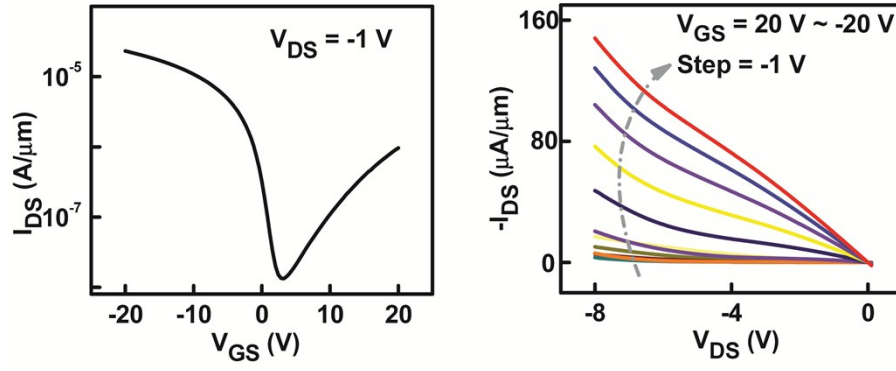

**Fig. S3** The transfer (at  $V_{DS} = -1.0$  V) and output (at  $V_{GS}$  of 20 V ~ -20 V) curves of the BP FETs using a 100 nm-thick  $\text{SiO}_2$  layer as gate dielectric and with channel length  $L$  of 3  $\mu\text{m}$ .

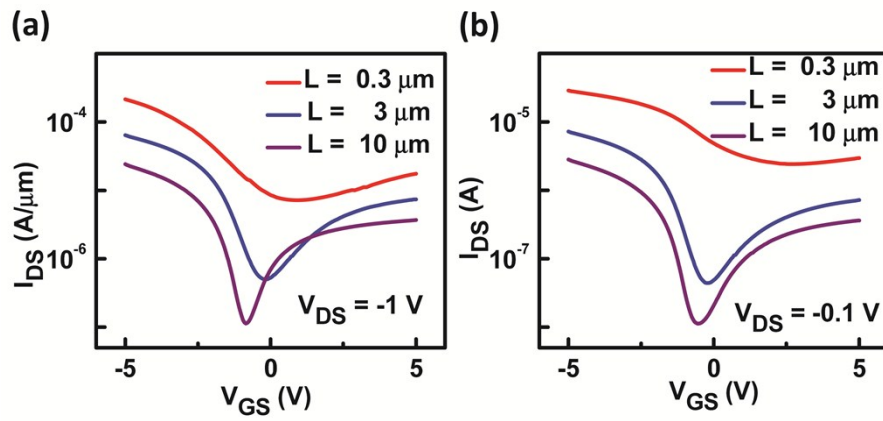

**Fig. S4** Transfer ( $I_{DS}$ — $V_{GS}$ ) curves of the BP FETs at (a)  $V_{DS} = -1.0 \text{ V}$  and (b)  $V_{DS} = -0.1 \text{ V}$  with channel length of 0.3, 3 and 10  $\mu\text{m}$ .

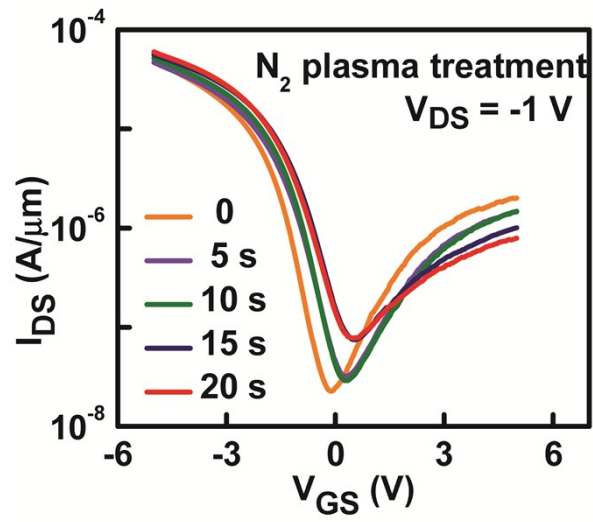

**Fig. S5** Transfer characteristics ( $I_{DS}-V_{GS}$ ) of the BP FETs under different N<sub>2</sub> plasma treatment duration (0, 5, 10, 15 and 20 s) at  $V_{DS} = -1.0$  V
